# Supplementary material
Source: PubMed Central journal article supplement (PMC5853125)

# Uncropped Gels from Extended Data Figure 2

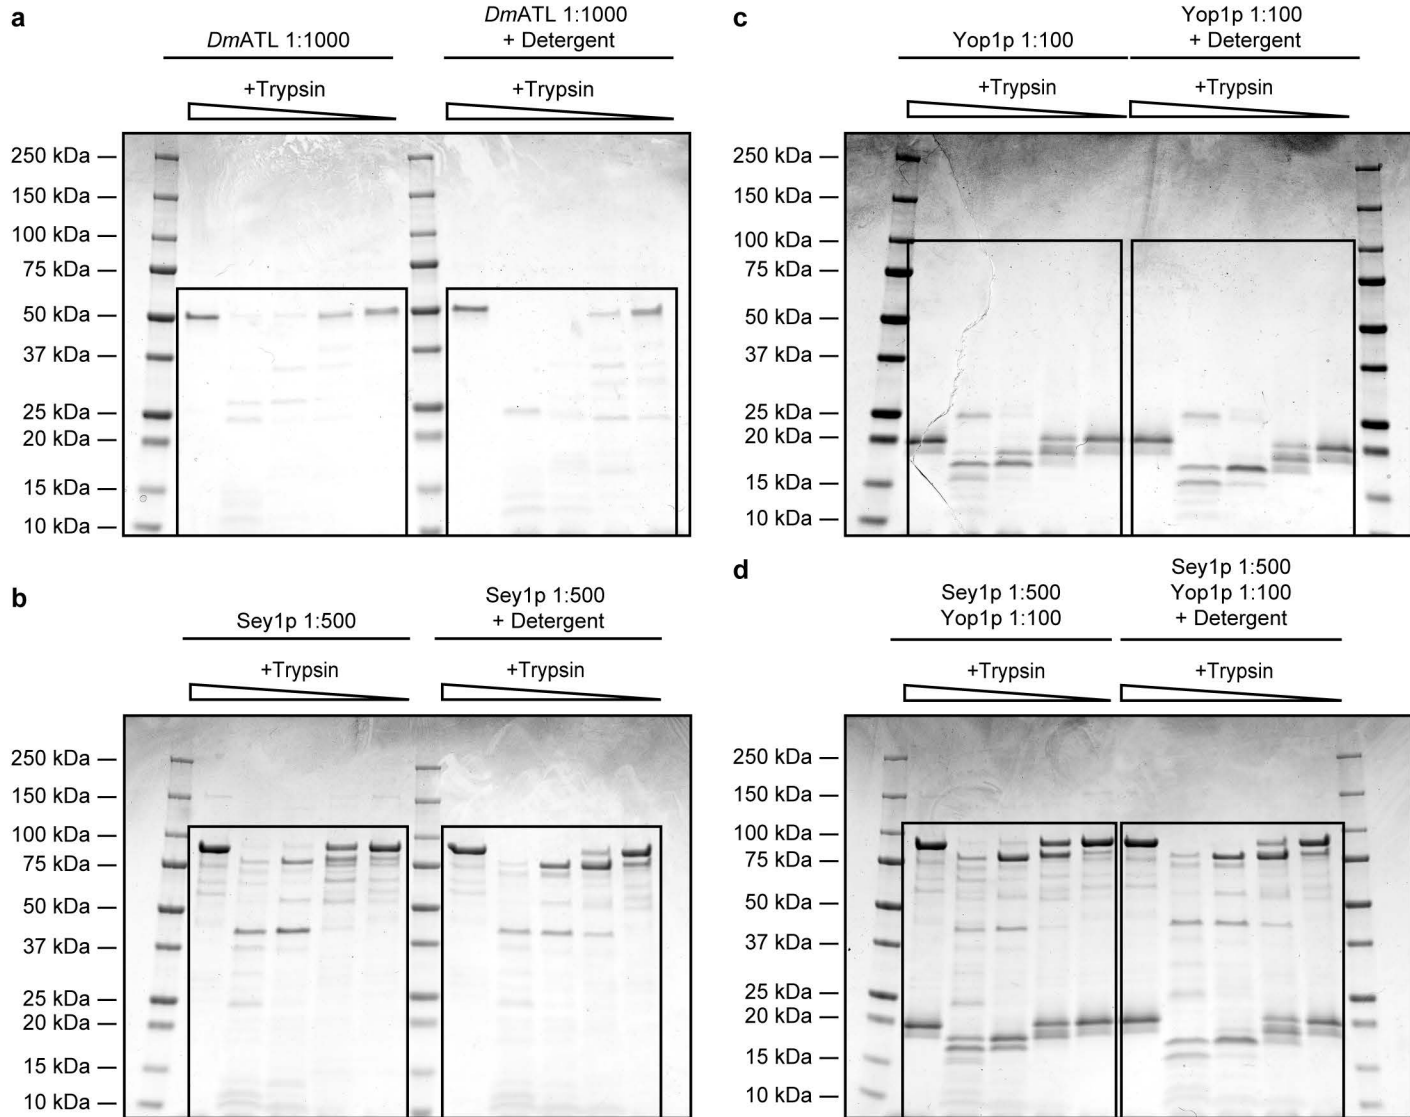

# Uncropped Gels from Extended Data Figure 3

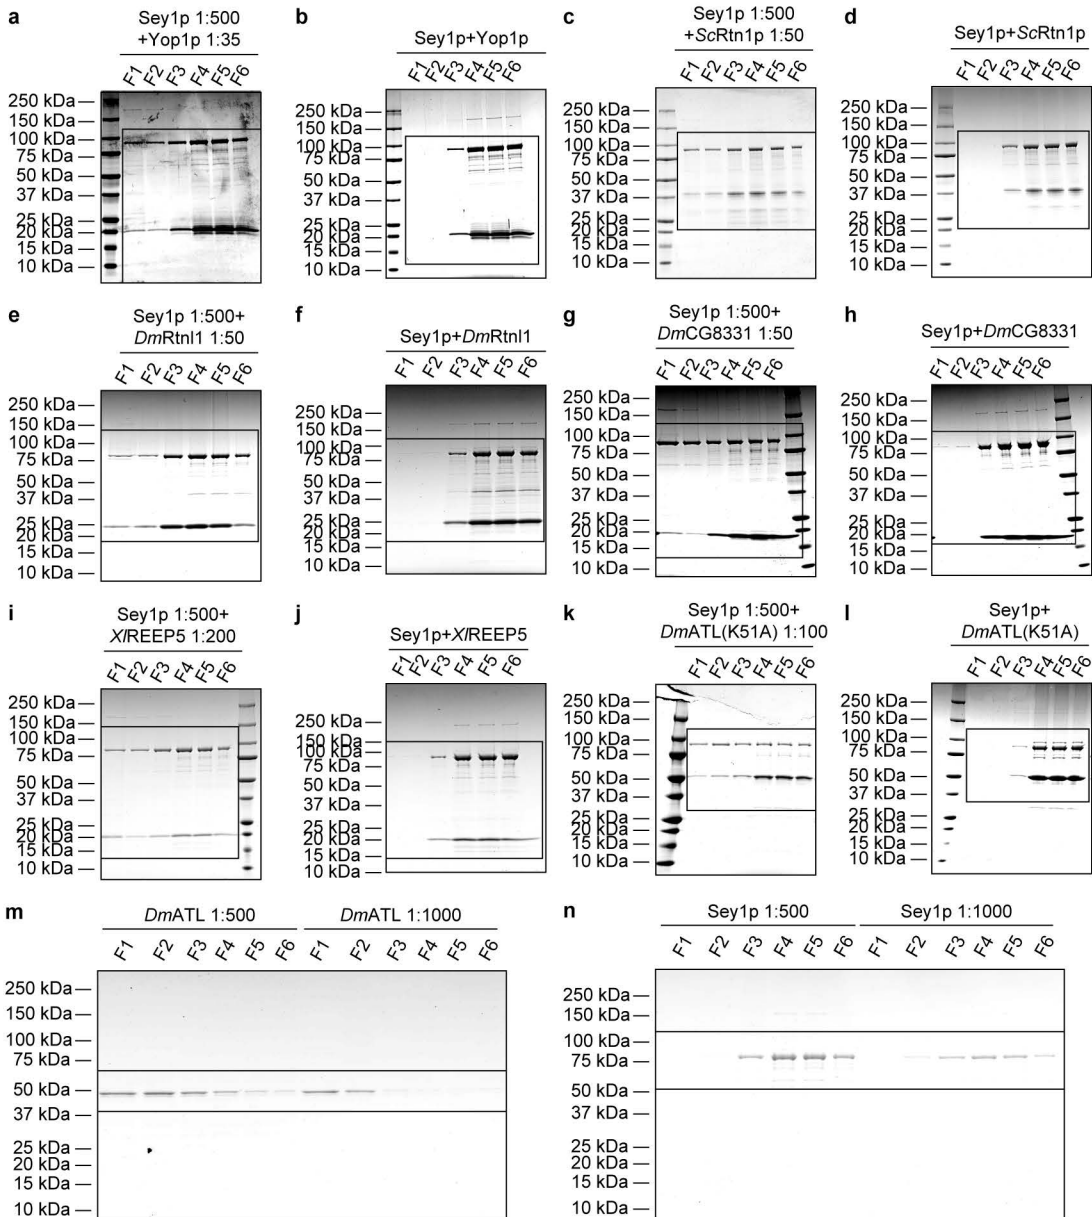

Supplement: NIHMS842720-supplement-Supplementary_.pdf [file NIHMS842720-supplement-Supplementary_.pdf]
